# Supplementary material for: Angiotensin II AT1Receptors Are Involved in Neuronal Activation Induced by Amphetamine in a Two-Injection Protocol
Source: Hindawi journal article supplement (doi:10.1155/2013/534817), 2013-01-01

Caudado Putamen

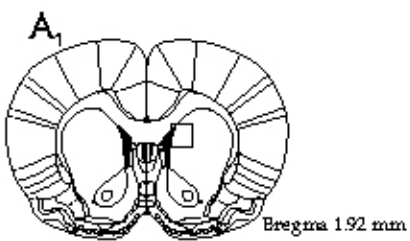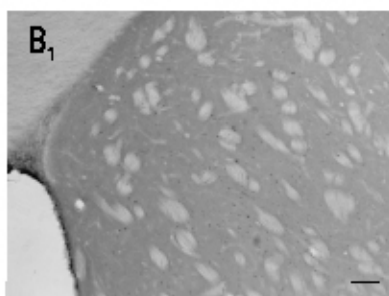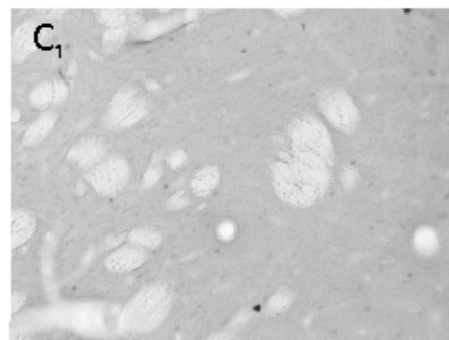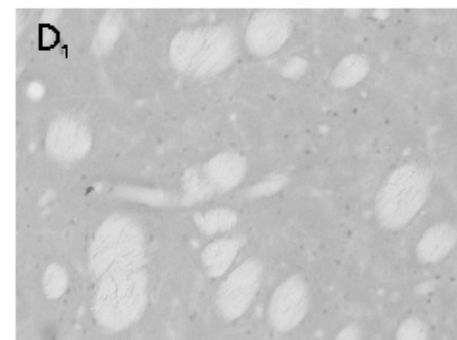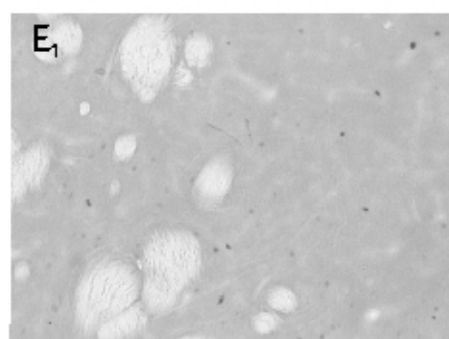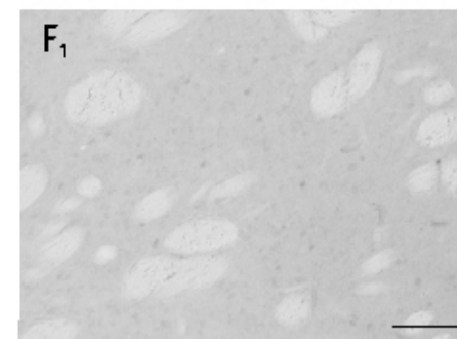

Nucleus Accumbens Core

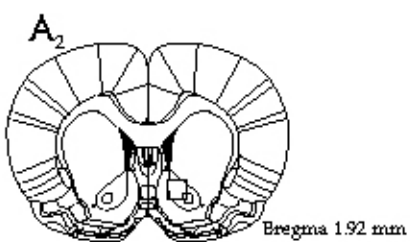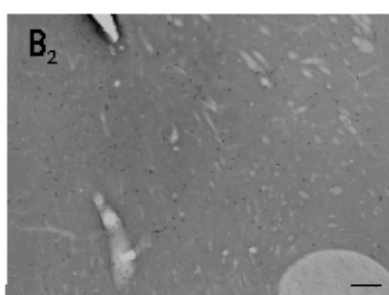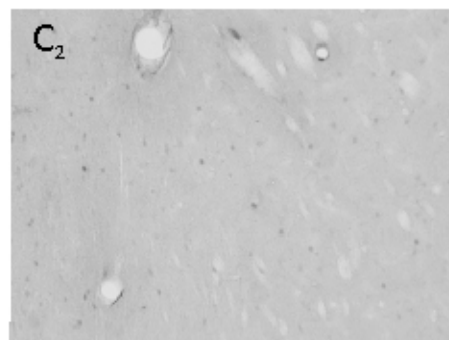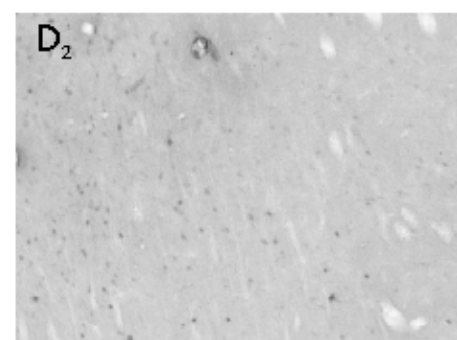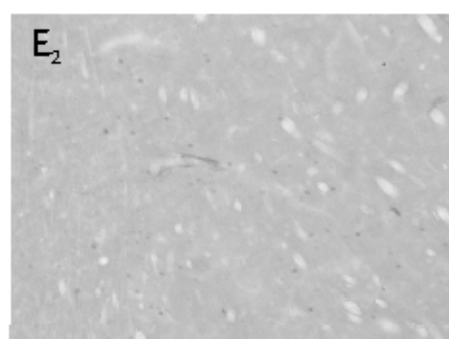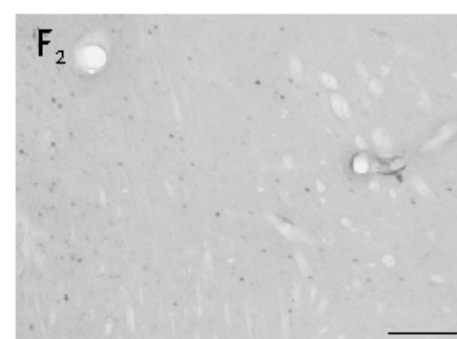

Nucleus Accumbens Shell

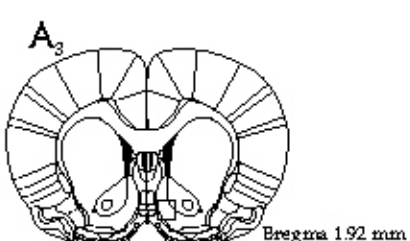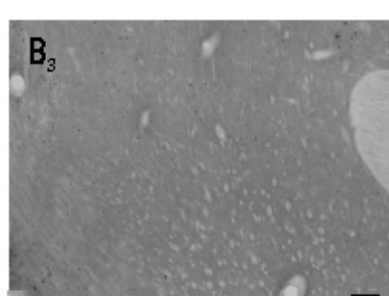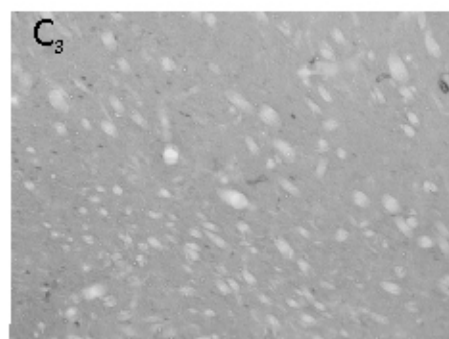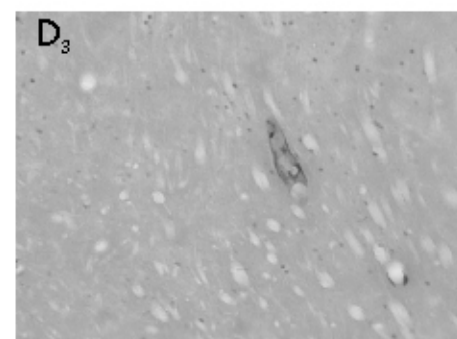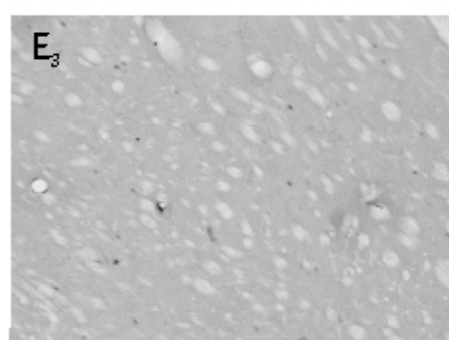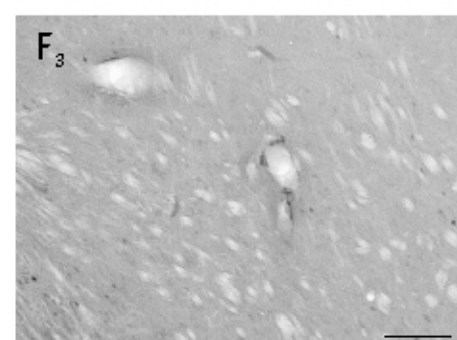

Infralimbic Cortex

A<sub>1</sub>

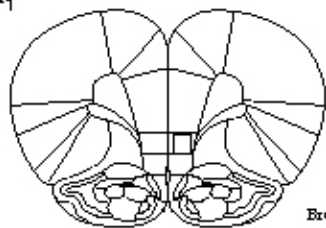

Bregma 3.72 mm

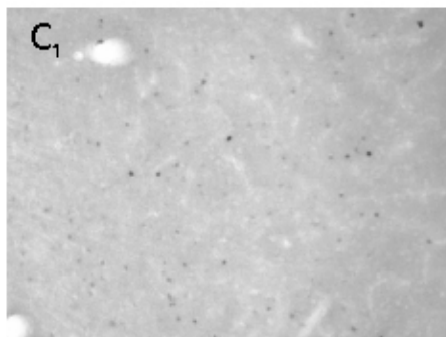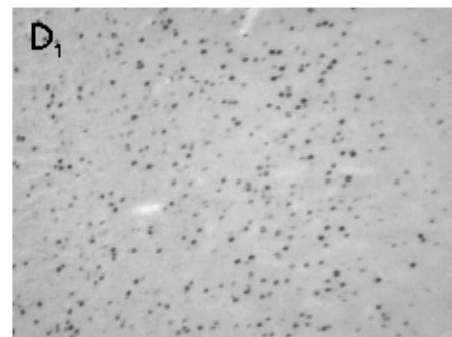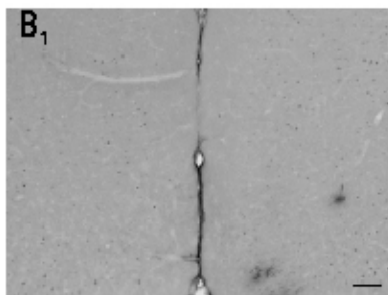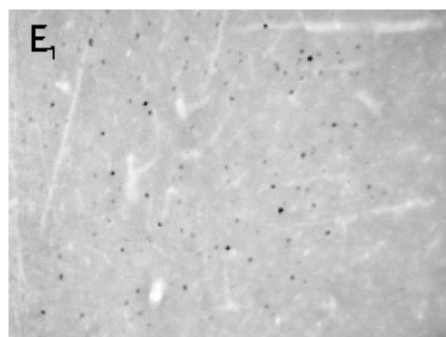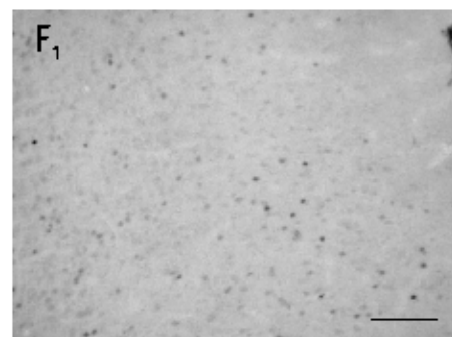

Ventral Tegmental Area

A<sub>2</sub>

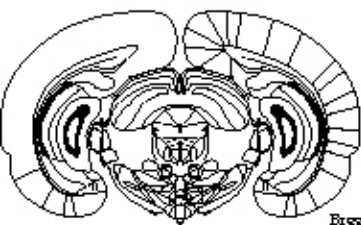

Bregma -6.48 mm

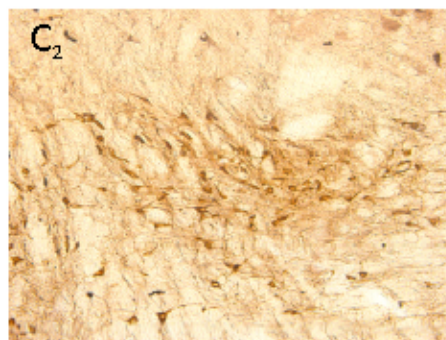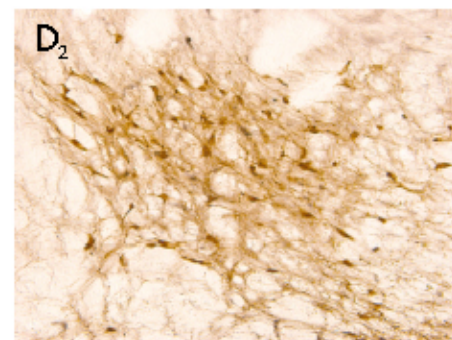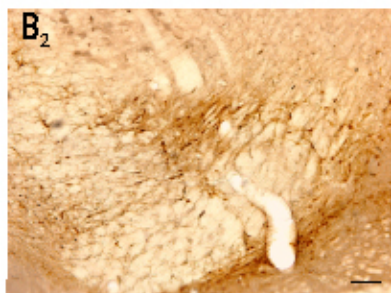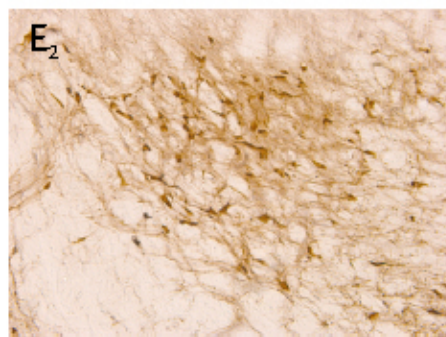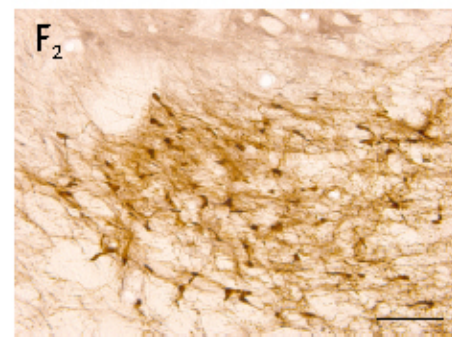

Supplement: f1 [file 534817.f1.pdf]
